# Supplementary material for: Melt-preparation of organic–inorganic Mn-based halide transparent ceramic scintillators for high-resolution X-ray imaging
Source: Royal Society of Chemistry journal article supplement (doi:10.1039/d4tc03459g), 2024-01-01
Supplement: d4tc03459g1.pdf [file d4tc03459g1.pdf]

## Supplementary Information

### Melt-Preparation of Organic-Inorganic Mn-Based Halide Transparent Ceramic Scintillators for High-Resolution X-ray Imaging

Zhi-Zhong Zhang,<sup>ab</sup> Zi-Lin He,<sup>b</sup> Qing-Peng Peng,<sup>b</sup> Jing-Hua Chen,<sup>b</sup> Bang Lan<sup>a</sup> and Dai-Bin Kuang<sup>\*b</sup>

Z.Z. Zhang, B. Lan

[a] Northeast Guangdong Key Laboratory of New Functional Materials, School of Chemistry and Environment, Jiaying University, Meizhou, 514015, P.R. China.

Z.Z. Zhang, Z.L. He, Q.P. Peng, J.H. Chen, D.B. Kuang

[b] Key Laboratory of Bioinorganic and Synthetic Chemistry of Ministry of Education, LIFM, GBRCE for Functional Molecular Engineering, School of Chemistry, IGCME, Sun Yat-Sen University, Guangzhou 510275, China.

E-mail: kuangdb@mail.sysu.edu.cn

## Experimental Section

### Materials

Manganese bromide ( $\text{MnBr}_2$ , Aladdin, 99.9%), Tetrabutylphosphonium bromide (TBPBr, Macklin, 98 %), hydrobromic acid (HBr, Aladdin, 48 weight% in water). The commercial scintillators of  $\text{Lu}_3\text{Al}_5\text{O}_{12}:\text{Ce}^{3+}$  (LuAG) and  $\text{Bi}_4\text{Ge}_3\text{O}_{12}$  (BGO) crystals were purchased from EPIC Crystal Inc.

### Preparation and growth of $\text{TBP}_2\text{MnBr}_4$ single crystals

The  $\text{TBP}_2\text{MnBr}_4$  single crystals were grown by the solution volatilization method. The raw materials of 2 mmol TBPBr and 1 mmol  $\text{MnBr}_2$  were dissolved in 5 mL HBr solution. Then, the solution was kept at 60 °C 5 h, then free cooling to room temperature, and the  $\text{TBP}_2\text{MnBr}_4$  single crystals were obtained after 24 h.

### Characterization of crystal structure

The single-crystal X-ray diffraction data of  $\text{TBP}_2\text{MnBr}_4$  was collected through an Agilent Technologies Gemini A Ultra system. The crystal structure of  $\text{TBP}_2\text{MnBr}_4$  was solved by using the SHELXTL and Olex2 program package,<sup>1</sup> and the structure symmetry was verified by the PLATON program.<sup>2</sup> Crystal structure refinement results are listed in Tables S1-S6. The CCDC numbers of  $\text{TBP}_2\text{MnBr}_4$  crystallographic data are 2354948.

### Measurements and characterizations

The powder XRD patterns of  $\text{TBP}_2\text{MnBr}_4$  crystal and TC were performed on a Miniflex600 diffractometer (Rigaku). Steady-state PL and time-resolved PL spectra were measured by an FLS980 spectrometer (Edinburgh Instruments Ltd.). The light transmittance spectrum of the  $\text{TBP}_2\text{MnBr}_4$ -TC was collected by using the UV-3600 spectrophotometer (Shimadzu). The PLQY value of  $\text{TBP}_2\text{MnBr}_4$  crystal and TC were obtained on a Hamamatsu C9920 PLQY measurement system equipped with an integrated sphere. TGA was carried out on a TG209F1 Libra TGA system under an  $\text{N}_2$  atmosphere. Differential scanning calorimetry (DSC) analysis was carried out on the

Netzsch DSC 214 instrument under an N<sub>2</sub> atmosphere at a heating/cooling rate of 10 K/min.

### Viscosity Measurements

Temperature-dependent viscosity tests of the TBP<sub>2</sub>MnBr<sub>4</sub> were carried out on a HAAKE MARS60 rotary rheometer. The sample was preheated to 150 °C to form a molten liquid and then cooled down at a rate of 5 °C min<sup>-1</sup>, the viscosity values and shear stress were recorded.

### Synthesis of TBP<sub>2</sub>MnBr<sub>4</sub>-TC

The TBP<sub>2</sub>MnBr<sub>4</sub> crystals were placed in a beaker and heated at 130 °C for 30 minutes on a heating plate to form a homogeneous melt. Then, the melt was poured into the preheated crystallizing dish and naturally cooled to room temperature, forming a homogeneous and transparent TBP<sub>2</sub>MnBr<sub>4</sub>-TC.

### Scintillation performance

The X-ray attenuation efficiency of TBP<sub>2</sub>MnBr<sub>4</sub> was calculated by the formula:  $AE = (1 - e^{-\mu \rho d}) \times 100\%$ . The attenuation coefficient ( $\mu$ ) obtained from the XCOM database of the National Institute of Standards and Technology (NIST),  $\rho$  is the density, and  $d$  is the thickness of the TBP<sub>2</sub>MnBr<sub>4</sub> scintillators. The radioluminescence spectra, relative light yields, and limit of radiation detection measurements were conducted according to the reported methods.<sup>3,4</sup> The light yield (LY) is calculated from Equation:

$$\frac{LY(Sample)}{LY(BGO)} = \frac{(\alpha(BGO) \int I(Sample)(\lambda) d\lambda)}{(\alpha(Sample) \int I(BGO)(\lambda) d\lambda)}.$$

Where  $\alpha$  is the absorption coefficient and  $I(\lambda)$  is the radioluminescence spectra by Ocean Optics QE65pro portable spectrometer.

**Table S1.** Crystal data and structure refinement for TBP<sub>2</sub>MnBr<sub>4</sub>.

| Empirical formula                                           | C <sub>32</sub> H <sub>72</sub> P <sub>2</sub> MnBr <sub>4</sub> |
|-------------------------------------------------------------|------------------------------------------------------------------|
| Formula weight                                              | 893.428                                                          |
| Temperature/K                                               | 138.61                                                           |
| Crystal system                                              | monoclinic                                                       |
| Space group                                                 | <i>P</i> 2 <sub>1</sub> / <i>c</i>                               |
| <i>a</i> /Å                                                 | 17.1677(7)                                                       |
| <i>b</i> /Å                                                 | 16.3806(8)                                                       |
| <i>c</i> /Å                                                 | 17.4132(8)                                                       |
| $\alpha$ /°                                                 | 90                                                               |
| $\beta$ /°                                                  | 118.325(2)                                                       |
| $\gamma$ /°                                                 | 90                                                               |
| Volume/Å <sup>3</sup>                                       | 4310.6(4)                                                        |
| <i>Z</i>                                                    | 4                                                                |
| $\rho_{\text{calc}}$ g/cm <sup>3</sup>                      | 1.377                                                            |
| $\mu$ /mm <sup>-1</sup>                                     | 4.106                                                            |
| F(000)                                                      | 1835.4                                                           |
| Radiation                                                   | Mo K $\alpha$ ( $\lambda$ = 0.71073)                             |
| 2 $\Theta$ range for data collection/°                      | 4.68 to 55.02                                                    |
| Index ranges                                                | -22 $\leq h \leq$ 22, -19 $\leq k \leq$ 21, -22 $\leq l \leq$ 22 |
| Reflections collected                                       | 50696                                                            |
| Independent reflections                                     | 9907 [ $R_{\text{int}}$ = 0.0799, $R_{\text{sigma}}$ = 0.0629]   |
| Data/restraints/parameters                                  | 9907/0/371                                                       |
| Goodness-of-fit on F <sup>2</sup>                           | 1.014                                                            |
| Final <i>R</i> indexes [ $I \geq 2\sigma(I)$ ] <sup>a</sup> | $R_1$ = 0.0421, $wR_2$ = 0.0921                                  |
| Final <i>R</i> indexes [all data] <sup>a</sup>              | $R_1$ = 0.0687, $wR_2$ = 0.1051                                  |
| Largest diff. peak/hole / e Å <sup>-3</sup>                 | 2.15/-1.37                                                       |

<sup>a</sup>  $R_1 = \Sigma||F_o| - |F_c||/\Sigma|F_o|$  and  $wR_2 = [\Sigma w(F_o^2 - F_c^2)^2 / \Sigma w F_o^4]^{1/2}$  for  $F_o^2 > 2\sigma(F_o^2)$

**Table S2.** Fractional atomic coordinates ( $\times 10^4$ ) and equivalent isotropic displacement parameters ( $\text{\AA}^2 \times 10^3$ ) for  $\text{TBP}_2\text{MnBr}_4$ .

| Atom | x          | y          | z          | U(eq)     |
|------|------------|------------|------------|-----------|
| Br01 | 1297.8(3)  | 11623.7(2) | 7947.4(3)  | 37.03(11) |
| Br02 | 2584.2(2)  | 9456.5(3)  | 8387.4(2)  | 38.60(11) |
| Br03 | 1800.7(3)  | 10543.1(3) | 6070.8(2)  | 40.56(11) |
| Br04 | 3811.9(4)  | 11607.6(5) | 8122.0(18) | 43.5(5)   |
| Br1  | 3787.1(16) | 11533(2)   | 8527(6)    | 48.6(14)  |
| Mn05 | 2386.0(3)  | 10827.9(3) | 7660.6(4)  | 31.64(14) |
| P006 | 4440.5(6)  | 3831.7(6)  | 6068.9(6)  | 28.9(2)   |
| P007 | 332.7(6)   | 10667.6(6) | 3374.6(6)  | 29.1(2)   |
| C008 | 1383(2)    | 11188(2)   | 3791(2)    | 29.2(8)   |
| C009 | 4935(2)    | 3754(2)    | 7240(2)    | 29.8(8)   |
| C00A | 2817(2)    | 3379(2)    | 5999(3)    | 34.6(8)   |
| C00B | 4275(3)    | 4893(2)    | 5759(2)    | 33.5(8)   |
| C00C | 421(2)     | 9716(2)    | 3926(3)    | 33.6(8)   |
| C00D | 5159(3)    | 3401(2)    | 5685(3)    | 34.5(8)   |
| C00E | -397(2)    | 11289(2)   | 3612(3)    | 34.6(8)   |
| C00F | 1131(2)    | 9127(2)    | 3987(2)    | 33.1(8)   |
| C00G | 2034(2)    | 10891(2)   | 3480(2)    | 35.5(9)   |
| C00H | 3927(3)    | 5413(2)    | 6263(2)    | 32.9(8)   |
| C00I | 3737(2)    | 6288(2)    | 5942(2)    | 33.5(8)   |
| C00J | 5870(2)    | 4122(2)    | 7719(2)    | 33.9(8)   |
| C00K | 5390(3)    | 2503(2)    | 5936(3)    | 40.3(10)  |
| C00L | 3408(3)    | 3276(3)    | 5574(3)    | 40.8(10)  |
| C00M | -1260(3)   | 10202(3)   | 268(2)     | 40.1(9)   |
| C00N | 1101(3)    | 8336(2)    | 4427(3)    | 39.6(9)   |
| C00O | 1991(3)    | 2852(3)    | 5564(3)    | 41.5(10)  |
| C00P | -1111(3)   | 12647(2)   | 3565(3)    | 42.3(10)  |
| C00Q | -592(3)    | 12148(3)   | 3234(3)    | 44.3(10)  |
| C00R | 2888(2)    | 11374(2)   | 3896(3)    | 38.5(9)   |
| C00S | -96(3)     | 10399(3)   | 2238(2)    | 40.9(9)   |
| C00T | 6172(3)    | 4268(3)    | 8686(2)    | 43.0(10)  |
| C00U | 1828(3)    | 7748(3)    | 4533(3)    | 44.5(10)  |
| C00V | 3523(3)    | 6810(3)    | 6532(3)    | 51.5(12)  |
| C00W | 6062(3)    | 2184(2)    | 5681(3)    | 45.0(10)  |
| C00X | -444(3)    | 10744(3)   | 704(2)     | 43.8(10)  |
| C00Y | 6297(3)    | 1294(3)    | 5935(3)    | 50.3(11)  |
| C00Z | -285(3)    | 11081(3)   | 1605(3)    | 42.9(10)  |
| C010 | 1410(3)    | 2938(3)    | 5994(3)    | 52.5(12)  |
| C011 | 3560(3)    | 11078(3)   | 3620(3)    | 48.4(11)  |
| C012 | 5744(3)    | 5013(3)    | 8851(3)    | 58.6(13)  |
| C013 | -1255(4)   | 13524(3)   | 3241(3)    | 56.5(13)  |

**Table S3.** Atomic occupancy for TBP<sub>2</sub>MnBr<sub>4</sub>.

| Atom | Occupancy | Atom | Occupancy |
|------|-----------|------|-----------|
| Br04 | 0.772(8)  | Br1  | 0.228(8)  |

**Table S4.** Bond lengths for TBP<sub>2</sub>MnBr<sub>4</sub>.

| Atom | Atom | Length/Å   |
|------|------|------------|
| Br01 | Mn05 | 2.5149(7)  |
| Br02 | Mn05 | 2.5210(7)  |
| Br03 | Mn05 | 2.5002(7)  |
| Br04 | Mn05 | 2.5304(11) |
| Mn05 | Br1  | 2.439(2)   |

**Table S5.** Bond angles for TBP<sub>2</sub>MnBr<sub>4</sub>.

| Atom | Atom | Atom | Angle/°    |
|------|------|------|------------|
| Br02 | Mn05 | Br01 | 107.35(2)  |
| Br03 | Mn05 | Br01 | 111.74(2)  |
| Br03 | Mn05 | Br02 | 106.10(2)  |
| Br04 | Mn05 | Br01 | 111.91(4)  |
| Br04 | Mn05 | Br02 | 114.24(4)  |
| Br04 | Mn05 | Br03 | 105.41(7)  |
| Br1  | Mn05 | Br01 | 103.86(14) |
| Br1  | Mn05 | Br02 | 104.64(17) |
| Br1  | Mn05 | Br03 | 122.2(3)   |

**Table S6.** Hydrogen bonds for TBP<sub>2</sub>MnBr<sub>4</sub>.

| D    | H    | A                 | d(D-H)/Å | d(H-A)/Å  | d(D-A)/Å  | <(D-H-A)/° |
|------|------|-------------------|----------|-----------|-----------|------------|
| C008 | H1   | Br01 <sup>1</sup> | 0.99     | 2.901(3)  | 3.850(4)  | 160.90(7)  |
| C008 | H    | Br03              | 0.99     | 2.931(3)  | 3.833(3)  | 151.92(7)  |
| C00B | H00e | Br02 <sup>2</sup> | 0.99     | 2.945(4)  | 3.904(4)  | 163.24(7)  |
| C00B | H00f | Br1 <sup>3</sup>  | 0.99     | 3.097(5)  | 3.988(5)  | 150.38(17) |
| C00C | H2   | Br01 <sup>4</sup> | 0.99     | 3.040(4)  | 3.877(4)  | 143.06(7)  |
| C00C | H2   | Br03 <sup>4</sup> | 0.99     | 3.110(4)  | 3.841(4)  | 131.81(7)  |
| C00C | Ha   | Br03              | 0.99     | 2.784(4)  | 3.605(4)  | 140.77(7)  |
| C00D | H00g | Br02 <sup>3</sup> | 0.99     | 2.846(4)  | 3.830(4)  | 172.59(7)  |
| C00D | H00h | Br04 <sup>2</sup> | 0.99     | 2.954(5)  | 3.934(5)  | 170.88(8)  |
| C00D | H00h | Br1 <sup>2</sup>  | 0.99     | 2.401(9)  | 3.360(9)  | 162.96(19) |
| C00E | Hb   | Br02 <sup>4</sup> | 0.99     | 3.118(4)  | 3.912(4)  | 138.14(7)  |
| C00I | H00k | Br04 <sup>3</sup> | 0.99     | 2.921(4)  | 3.759(4)  | 143.03(9)  |
| C00I | H00k | Br1 <sup>3</sup>  | 0.99     | 3.019(5)  | 3.919(5)  | 151.72(12) |
| C00L | H00q | Br1 <sup>2</sup>  | 0.99     | 3.261(11) | 3.929(11) | 126.30(9)  |
| C00O | H00s | Br03 <sup>5</sup> | 0.99     | 3.104(4)  | 3.932(4)  | 142.07(8)  |
| C00R | Hj   | Br1 <sup>1</sup>  | 0.99     | 3.164(8)  | 3.936(5)  | 135.91(10) |
| C00S | H11  | Br01 <sup>4</sup> | 0.99     | 3.015(4)  | 3.835(4)  | 140.95(8)  |
| C00S | H11  | Br02 <sup>4</sup> | 0.99     | 3.121(4)  | 3.882(4)  | 134.75(8)  |
| C00T | H00v | Br03 <sup>3</sup> | 0.99     | 3.123(4)  | 3.905(4)  | 136.98(7)  |

<sup>1</sup>+X,5/2-Y,-1/2+Z; <sup>2</sup>+X,3/2-Y,-1/2+Z; <sup>3</sup>1-X,-1/2+Y,3/2-Z; <sup>4</sup>-X,2-Y,1-Z; <sup>5</sup>+X,-1+Y,+Z



**Table S7.** Comparison of scintillation performance of recently reported single-crystal/ceramic scintillators.

| Materials                                                                       | Type    | Optical<br>transparency | Light yield<br>(photons/MeV) | Detection<br>limit<br>(nGy/s) | Imaging<br>resolution<br>(lp/mm) | Ref          |
|---------------------------------------------------------------------------------|---------|-------------------------|------------------------------|-------------------------------|----------------------------------|--------------|
| TEA <sub>2</sub> MnI <sub>4</sub>                                               | crystal | 90%                     | 26288                        | 10.1                          | 25                               | 3            |
| (2-DMAP) <sub>2</sub> MnBr <sub>4</sub>                                         | crystal | 93.6%                   | 22000                        | 76.35                         | 20-25                            | 5            |
| (PEA) <sub>2</sub> PbBr <sub>4</sub>                                            | crystal | —                       | 73226                        | 40.4                          | 11.1                             | 6            |
| Cs <sub>3</sub> Cu <sub>2</sub> Cl <sub>5</sub>                                 | crystal | 86%                     | 95,000                       | 2700                          | 105                              | 7            |
| Y <sub>3</sub> Al <sub>5</sub> O <sub>12</sub> :Ce <sup>3+</sup>                | ceramic | 82%                     | 24600                        | 157.4                         | 34.7                             | 8            |
| TPP <sub>2</sub> MnBr <sub>4</sub>                                              | ceramic | 68%                     | 78000                        | 8.8                           | 15.7                             | 9            |
| [C <sub>8</sub> H <sub>20</sub> N] <sub>2</sub> Cu <sub>2</sub> Br <sub>4</sub> | ceramic | —                       | 91300                        | 52.1                          | 9.54                             | 10           |
| TBP <sub>2</sub> MnBr <sub>4</sub>                                              | ceramic | 80 %                    | 4840                         | 516                           | 16                               | This<br>work |

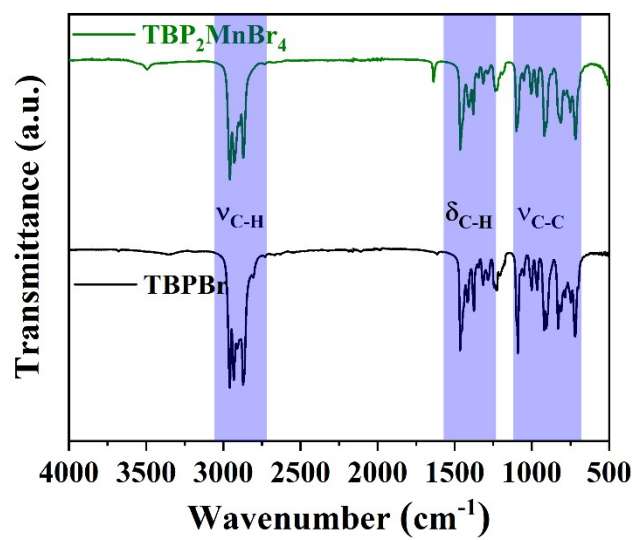

**Figure S1.** The infrared spectra of  $\text{TBP}_2\text{MnBr}_4$  crystalline and  $\text{TBPBr}$  organic salts.

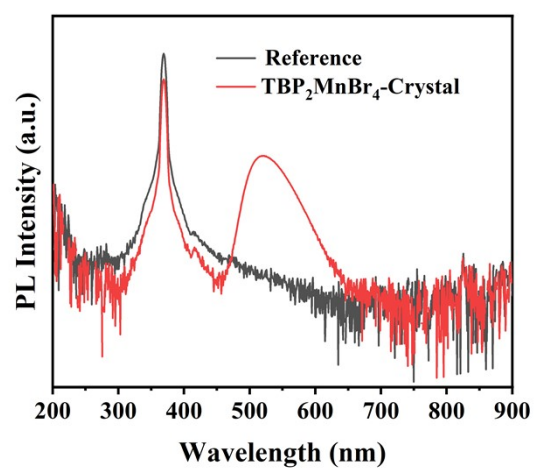

**Figure S2.** The PLQY curve of TBP<sub>2</sub>MnBr<sub>4</sub>-crystal under 370 nm UV excitation.

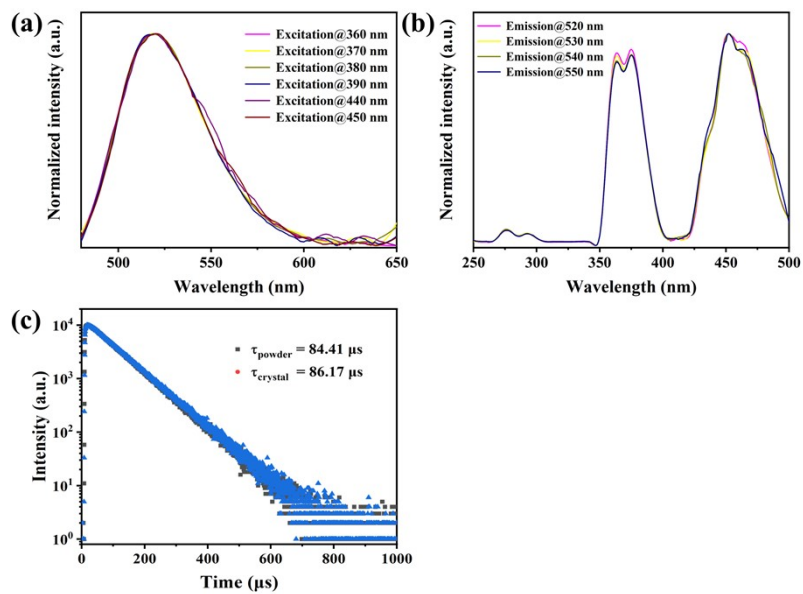

**Figure S3.** (a) Emission-wavelength-dependent PLE spectra of TBP<sub>2</sub>MnBr<sub>4</sub>-crystal, (b) excitation-wavelength-dependent PL spectra of TBP<sub>2</sub>MnBr<sub>4</sub>-crystal, (c) the TRPL spectra of polycrystalline powder and crystal of TBP<sub>2</sub>MnBr<sub>4</sub>-crystal.

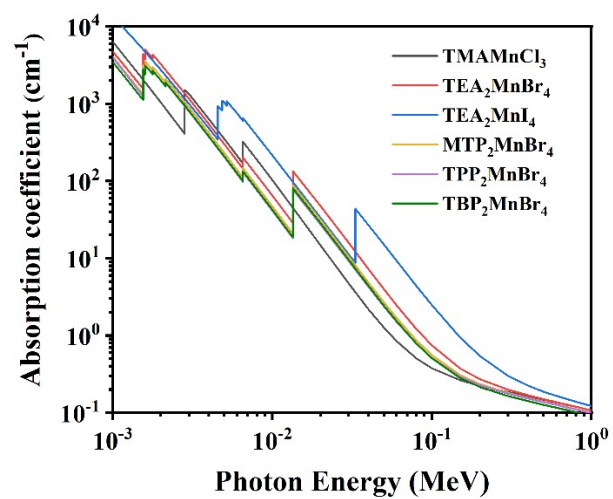

**Figure S4.** X-ray absorption coefficients plots for TBP<sub>2</sub>MnBr<sub>4</sub> and other reported Mn(II)-based OIMHs as a function of photon energy.

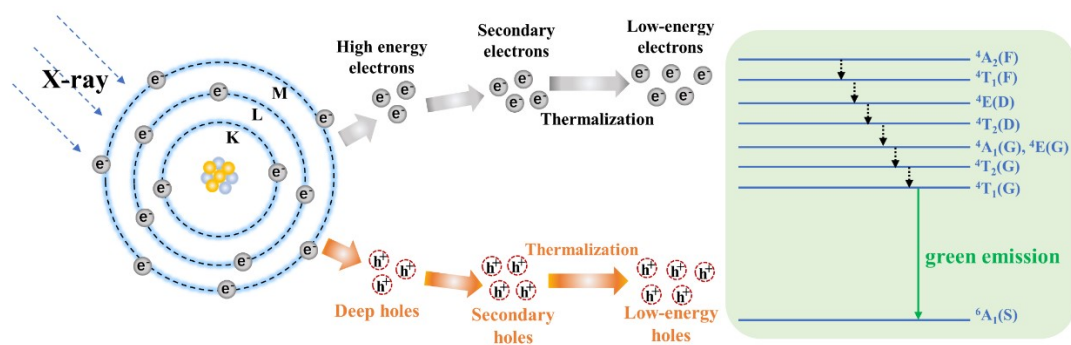

**Figure S5.** Schematic diagram of the scintillating mechanism.

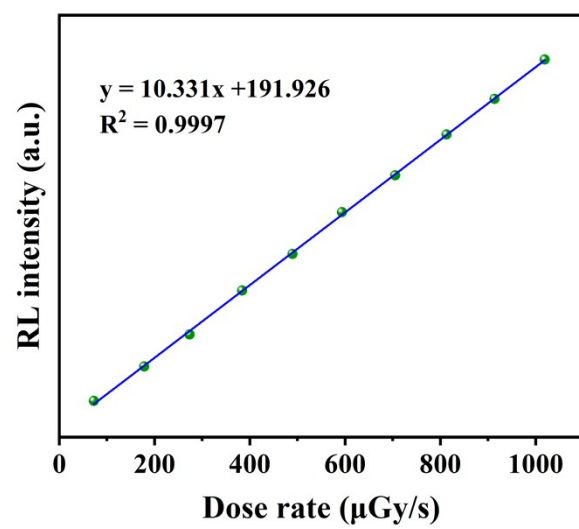

**Figure S6.** The linear relationship between the dose rate and RL intensity for  $\text{TBP}_2\text{MnBr}_4$ -crystal.

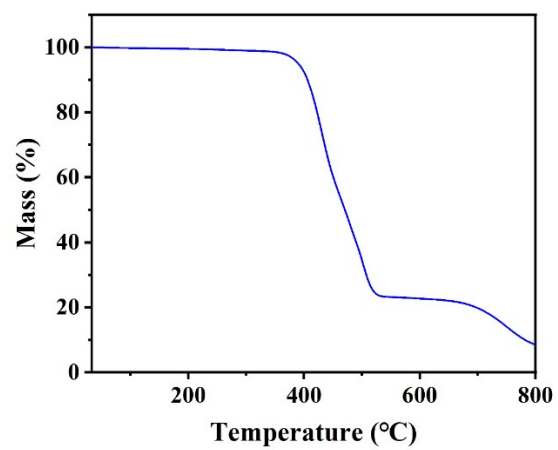

**Figure S7.** The TG curve of TBP<sub>2</sub>MnBr<sub>4</sub>-crystal.



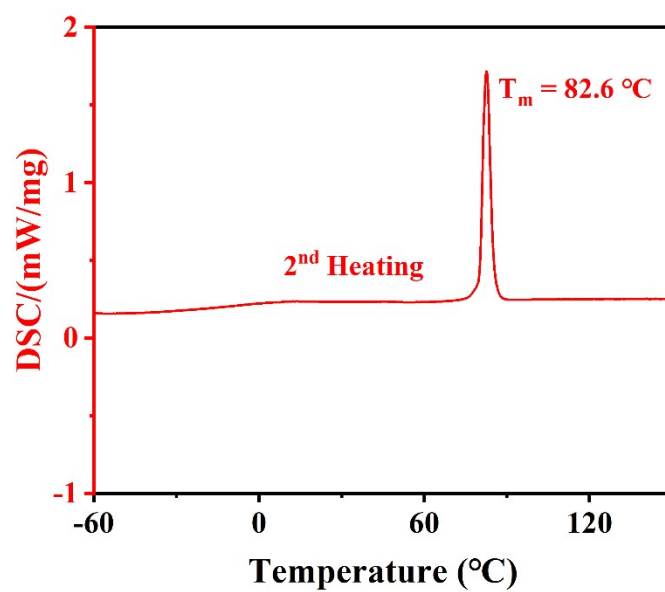

**Figure S8.** The DSC curve of TBP<sub>2</sub>MnBr<sub>4</sub>-crystal for the secondary heating.

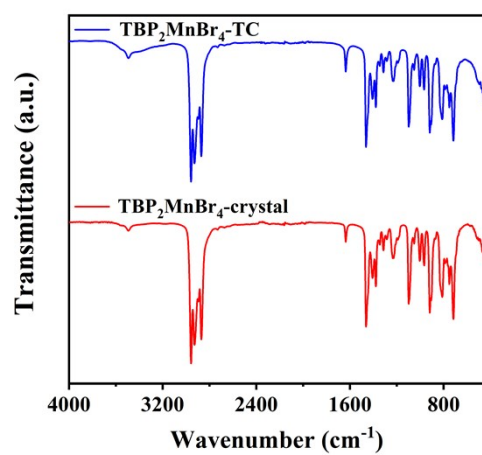

**Figure S9.** ATR-FTIR spectra of TBP<sub>2</sub>MnBr<sub>4</sub>-crystal and TBP<sub>2</sub>MnBr<sub>4</sub>-TC.

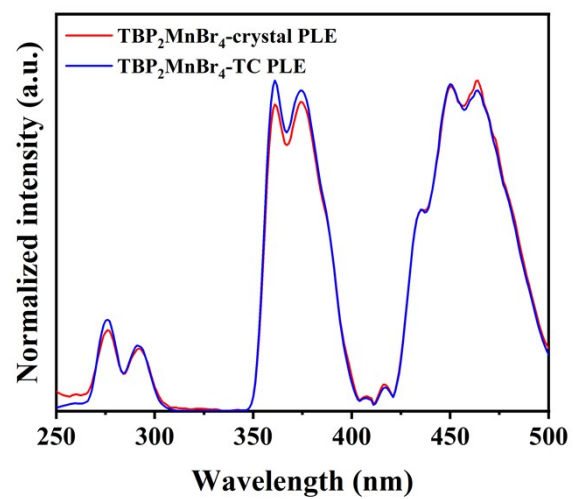

**Figure S10.** The PLE spectra of TBP<sub>2</sub>MnBr<sub>4</sub>-crystal and TBP<sub>2</sub>MnBr<sub>4</sub>-TC.

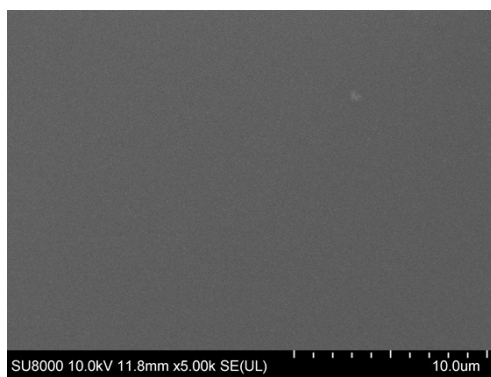

**Figure S11.** SEM image of TBP<sub>2</sub>MnBr<sub>4</sub>-TC.

## Reference

- 1 O. V. Dolomanov, L. J. Bourhis, R. J. Gildea, J. A. K. Howard, H. Puschmann, *J. Appl. Crystallogr.* 2009, **42**, 339.
- 2 A. L. Spek, *J. Appl. Crystallogr.* 2003, **36**, 7.
- 3 Z.-Z. Zhang, J.-H. Wei, J.-B. Luo, X.-D. Wang, Z.-L. He, D.-B. Kuang, *ACS Appl. Mater. Interfaces* 2022, **14**, 47913-47921.
- 4 J.-B. Luo, J.-H. Wei, Z.-Z. Zhang, Z.-L. He, D.-B. Kuang, *Angew. Chem. Int. Ed.* 2023, **62**, e202216504.
- 5 Z. L. He, J. H. Wei, Z. Z. Zhang, J. B. Luo and D. B. Kuang, *Adv. Optical Mater.*, 2023, **11**, 2300449.
- 6 B. X. Jia, D. P. Chu, N. Li, Y. X. Zhang, Z. Yang, Y. J. Hu, Z. Q. Zhao, J. S. Feng, X. D. Ren, H. Zhang, G. T. Zhao, H. M. Sun, N. Y. Yuan, J. N. Ding, Y. C. Liu and S. Z. Liu, *ACS Energy Lett.*, 2023, **8**, 590-599.
- 7 W. Xiang, D. Shen, X. Zhang, X. Li, Y. Liu and Y. Zhang, *ACS Appl. Mater. Interfaces*, 2024, **16**, 4918-4924.
- 8 T. Ji, T. Wang, H. Li, Q. Peng, H. Tang, S. Hu, A. Yakovlev, Y. Zhong and X. Xu, *Adv. Optical Mater.*, 2022, **10**, 2102056.
- 9 K. Han, K. Sakhatskyi, J. Jin, Q. Zhang, M. V. Kovalenko and Z. Xia, *Adv. Mater.*, 2022, **34**, 2110420.
- 10 B. Su, J. Jin, K. Han and Z. Xia, *Adv. Funct. Mater.*, 2022, **33**, 2210735.
